# Supplementary material
Source: publisher site journal article supplement (https://www.dovepress.com/article/458618)

Castro et al

**iPREDICT: characterization of asthma triggers and selection of digital technology to predict changes in disease control**

Mario Castro, Merrill Zavod, Annika Rutgersson, Magnus Jörntén-Karlsson, Bhaskar Dutta, Lynn Hagger

**Supplementary information**

**Supplementary Table 1** Survey administered to healthy volunteers at weeks 2 and 4 to quantify the usability of the respective device/sensor

| **#** | **Question** | | | | | | | | | | | | | | | | | | | | | | | | | | | | | | | | | | | | | | |
| --- | --- | --- | --- | --- | --- | --- | --- | --- | --- | --- | --- | --- | --- | --- | --- | --- | --- | --- | --- | --- | --- | --- | --- | --- | --- | --- | --- | --- | --- | --- | --- | --- | --- | --- | --- | --- | --- | --- | --- |
| 1 | Please select your Test ID | | | | | | | | | | | | | | | | | | | | | | | | | | | | | | | | | | | | | | |
| 2 | What is the primary parameter you are tracking? | | | | | | | | | | | | | | | | | | | | | | | | | | | | | | | | | | | | | | |
| 3 | Please specify the number of sensors you are evaluating - for each sensor, you will answer a set of questions. | | | | | | | | | | | | | | | | | | | | | | | | | | | | | | | | | | | | | | |
| 4 | Please enter the name of the sensor | | | | | | | | | | | | | | | | | | | | | | | | | | | | | | | | | | | | | | |
| 5 | If you consider your initial understanding of the sensor, did it work and function as you expected? | | | | | | | | | | | | | | | | | | | | | | | | | | | | | | | | | | | | | | |
| □Yes, I did | | | | | | | | | | | | | | | | | | | | | | | | | | | | | | | | | | | | | | |
| □Yes, I didn’t | | | | | | | | | | | | | | | | | | | | | | | | | | | | | | | | | | | | | | |
| If not, why? | | | | | | | | | | | | | | | | | | | | | | | | | | | | | | | | | | | | | | |
| 6 | How difficult or easy was it to use? Please rate from a scale (0–10) where 0 is “Extremely difficult” and 10 is “Extremely easy” | | | | | | | | | | | | | | | | | | | | | | | | | | | | | | | | | | | | | | |
|  | | | | | 0 | | 1 | | 2 | | | | 3 | | | 4 | | | | 5 | | 6 | | | | 7 | | | | 8 | | | | | 9 | | | 10 |
| The sensor itself | | | | | □ | | □ | | □ | | | | □ | | | □ | | | | □ | | □ | | | | □ | | | | □ | | | | | □ | | | □ |
| Connecting the sensor to record information | | | | | □ | | □ | | □ | | | | □ | | | □ | | | | □ | | □ | | | | □ | | | | □ | | | | | □ | | | □ |
| Using the app/service accompanying the sensor | | | | | □ | | □ | | □ | | | | □ | | | □ | | | | □ | | □ | | | | □ | | | | □ | | | | | □ | | | □ |
|  | If you had problems, please describe them | | | | | | | | | | | | | | | | | | | | | | | | | | | | | | | | | | | | | | |
| 7 | How comfortable was it to wear and/or use? Please rate from a scale (0–10) where 0 is "Extremely uncomfortable" and 10 is "Extremely comfortable." | | | | | | | | | | | | | | | | | | | | | | | | | | | | | | | | | | | | | | |
| 0 | 1 | 2 | | | | 3 | | 4 | | | | | | | 5 | | | | 6 | | 7 | | | | | | | | 8 | | | 9 | | | | | 10 | |
| □ | □ | □ | | | | □ | | □ | | | | | | | □ | | | | □ | | □ | | | | | | | | □ | | | □ | | | | | □ | |
| If you had problems, please describe them | | | | | | | | | | | | | | | | | | | | | | | | | | | | | | | | | | | | | | |
| 8 | How often did you have problems with: | | | | | | | | | | | | | | | | | | | | | | | | | | | | | | | | | | | | | | |
|  | | | Every time I used it | | | | | | | | Frequently, eg, many times per week | | | | | | Often, eg, every week | | | | | | | Once or twice | | | | | | | | | Never | | | | | |
| The sensor itself | | | □ | | | | | | | | □ | | | | | | □ | | | | | | | □ | | | | | | | | | □ | | | | | |
| Connecting the sensor to record information | | | □ | | | | | | | | □ | | | | | | □ | | | | | | | □ | | | | | | | | | □ | | | | | |
| The app/service accompanying the sensor | | | □ | | | | | | | | □ | | | | | | □ | | | | | | | □ | | | | | | | | | □ | | | | | |
| 9 | Was the information recorded by the sensor shared and presented to you in a relevant way? | | | | | | | | | | | | | | | | | | | | | | | | | | | | | | | | | | | | | | |
| □Yes | | | | | | | | | | | | | | | | | | | | | | | | | | | | | | | | | | | | | | |
| □No | | | | | | | | | | | | | | | | | | | | | | | | | | | | | | | | | | | | | | |
| Please elaborate - what more would you have liked or what you were expecting? | | | | | | | | | | | | | | | | | | | | | | | | | | | | | | | | | | | | | | |
| 10 | How would you rate the "quality" of the collected information? Please use a scale (0–10) where 0 is "Extremely low" and 10 is "Extremely high." | | | | | | | | | | | | | | | | | | | | | | | | | | | | | | | | | | | | | | |
|  | | | | | 0 | | 1 | | 2 | | | | 3 | | | 4 | | | | 5 | | 6 | | | | 7 | | | | 8 | | | | | 9 | | | 10 |
| Relevance: the information is meaningful | | | | | □ | | □ | | □ | | | | □ | | | □ | | | | □ | | □ | | | | □ | | | | □ | | | | | □ | | | □ |
| Accuracy: the information is trustworthy and correct | | | | | □ | | □ | | □ | | | | □ | | | □ | | | | □ | | □ | | | | □ | | | | □ | | | | | □ | | | □ |
| Importance: the information is important to you | | | | | □ | | □ | | | □ | | | | □ | | □ | | | | □ | | | □ | | | | □ | | | □ | | | | | □ | | | □ |
| 11 | Please help us understand your view on the usability and how it works | | | | | | | | | | | | | | | | | | | | | | | | | | | | | | | | | | | | | | |
| What was the best experience using the sensor? Please describe | | | | | | | | | | | | | | | | | | | | | | | | | | | | | | | | | | | | | | |
| What functions or features did you find specifically relevant to you? | | | | | | | | | | | | | | | | | | | | | | | | | | | | | | | | | | | | | | |
| What function or feature did you not see the need for? | | | | | | | | | | | | | | | | | | | | | | | | | | | | | | | | | | | | | | |
| What functions or features did you not use at all? | | | | | | | | | | | | | | | | | | | | | | | | | | | | | | | | | | | | | | |
| 12 | How likely is it that you would recommend the sensor to your friends and family? Please rate on a scale (0–10) where 0 is "Not at all" and 10 is "Extremely likely." | | | | | | | | | | | | | | | | | | | | | | | | | | | | | | | | | | | | | | |
| 0 | 1 | 2 | | | | 3 | | 4 | | | | | | | 5 | | | | 6 | | 7 | | | | | | | 8 | | | 9 | | | | | 10 | | |
| □ | □ | □ | | | | □ | | □ | | | | | | | □ | | | | □ | | □ | | | | | | | □ | | | □ | | | | | □ | | |
| 13 | Please rate all statements below on a scale between 1 and 5 (where 1 = Strongly Disagree and 5 = Strongly Agree) that describes your experience using the sensor: | | | | | | | | | | | | | | | | | | | | | | | | | | | | | | | | | | | | | | |
|  | | | | Strongly disagree | | | | | | | | Disagree | | | | | | Neutral | | | | | | | Agree | | | | | | | | | Strongly agree | | | | |
| I think that I would like to use it frequently | | | | □ | | | | | | | | □ | | | | | | □ | | | | | | | □ | | | | | | | | | □ | | | | |
| I found it unnecessarily complex | | | | □ | | | | | | | | □ | | | | | | □ | | | | | | | □ | | | | | | | | | □ | | | | |
| I thought it was easy to use | | | | □ | | | | | | | | □ | | | | | | □ | | | | | | | □ | | | | | | | | | □ | | | | |
| I think that I would need the support of a technical person to be able to use this sensor | | | | □ | | | | | | | | □ | | | | | | □ | | | | | | | □ | | | | | | | | | □ | | | | |
| I found the various functions and features well integrated | | | | □ | | | | | | | | □ | | | | | | □ | | | | | | | □ | | | | | | | | | □ | | | | |
| I needed to learn a lot of things before I could get going | | | | □ | | | | | | | | □ | | | | | | □ | | | | | | | □ | | | | | | | | | □ | | | | |
| Other reflections | | | | | | | | | | | | | | | | | | | | | | | | | | | | | | | | | | | | | | |
| 14 | Did your sensor and/or app capture any other parameters? | | | | | | | | | | | | | | | | | | | | | | | | | | | | | | | | | | | | | | |
| □ Yes, it did | | | | | | | | | | | | | | | | | | | | | | | | | | | | | | | | | | | | | | |
| □ No, it didn’t | | | | | | | | | | | | | | | | | | | | | | | | | | | | | | | | | | | | | | |
| Please describe other parameters captured. | | | | | | | | | | | | | | | | | | | | | | | | | | | | | | | | | | | | | | |
| 15 | Thinking of these other parameters - what would be your overall impression about these? | | | | | | | | | | | | | | | | | | | | | | | | | | | | | | | | | | | | | | |

**Note:** Survey questions were derived from the SUS and an internally developed questionnaire.

**Abbreviation:** SUS, System Usability Scale.

**Supplementary Table 2** Devices ranked based on measured parameters

| **Device** | **Activity** | **HR** | **ECG** | **RR** | **Spirometry** | **Sleep** | **Posture** | **Body temperature** | **FeNO** | **Others** |
| --- | --- | --- | --- | --- | --- | --- | --- | --- | --- | --- |
| Wireless biometric patch  (HealthPatch MD) |  |  |  |  |  |  |  |  |  | Stress/battery level/impedance |
| Vital sign monitor (Zephyr BioPatch) |  |  |  |  |  |  |  |  |  | Battery level |
| Chest-based wearable activity monitor  (Zephyr BioHarness 3) |  |  |  |  |  |  |  |  |  | Battery level |
| Smart band activity tracker 1 (Microsoft Band 2) |  |  |  |  |  |  |  |  |  | Email/SMS/phone notifications |
| Smart band activity tracker 2  (Healbe GoBe) |  |  |  |  |  |  |  |  |  | Stress/hydration level |
| Smart band activity tracker 3  (Mio FUSE) |  |  |  |  |  |  |  |  |  |  |
| Smart band activity tracker 4  (Garmin Vivosmart HR) |  |  |  |  |  |  |  |  |  | Email/SMS/phone notifications |
| HR monitor (BodyGuardian Heart) |  |  |  |  |  |  |  |  |  | Impedance |
| Sleep monitor (MySleep S+) |  |  |  |  |  |  |  |  |  |  |
| Peak flow meter (Smart Peak Flow) |  |  |  |  |  |  |  |  |  |  |
| Spirometer 1 (Spirobank II) |  |  |  |  |  |  |  |  |  | Oxygen saturation |
| Spirometer 2 (Smart Spirometry) |  |  |  |  |  |  |  |  |  |  |
| FeNO monitor (NiOx Vero) |  |  |  |  |  |  |  |  |  |  |

**Note:** Green indicates measurable parameters, and red indicates parameters not measured by the device.

**Abbreviations:** ECG, electrocardiogram, FeNO, fractional exhaled nitric oxide, HR, heart rate, RR, respiratory rate, SMS, short message service.

**Supplementary Figure 1** Patient triggers survey: inclusion criteria and patient flow. “Views” counts unique users who opened one or more invites (survey invite and reminder messaging).


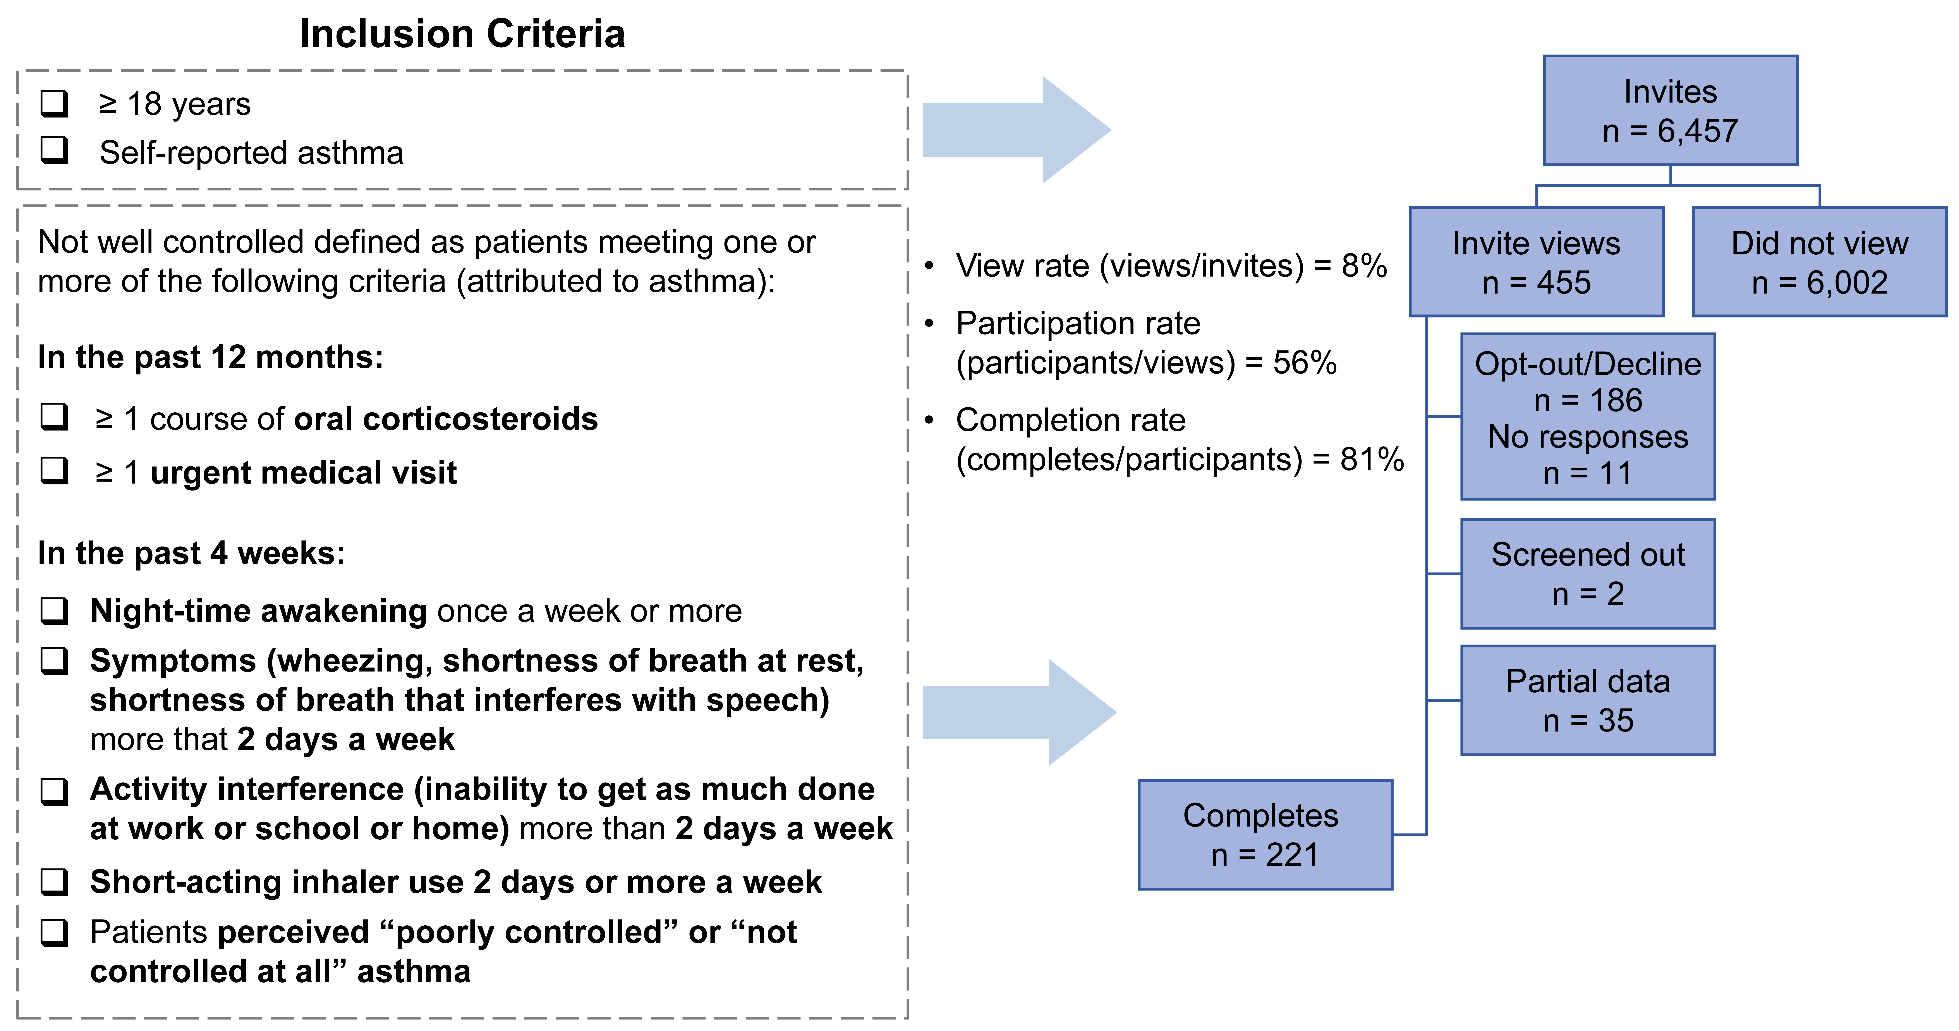

Supplement: Supplementary file 1 [file get_supplementary_file.php]
